# Supplementary material
Source: PubMed Central journal article supplement (PMC5634932)
Supplement: NIHMS865778-supplement-Supp_info.pdf [file NIHMS865778-supplement-Supp_info.pdf]

# Web-based Supplementary Materials

for *Efficient Bayesian hierarchical functional data analysis with basis function approximations using Gaussian-Wishart processes*

by Jingjing Yang, Dennis D. Cox, Jong Soo Lee, Peng Ren, Taeryon Choi

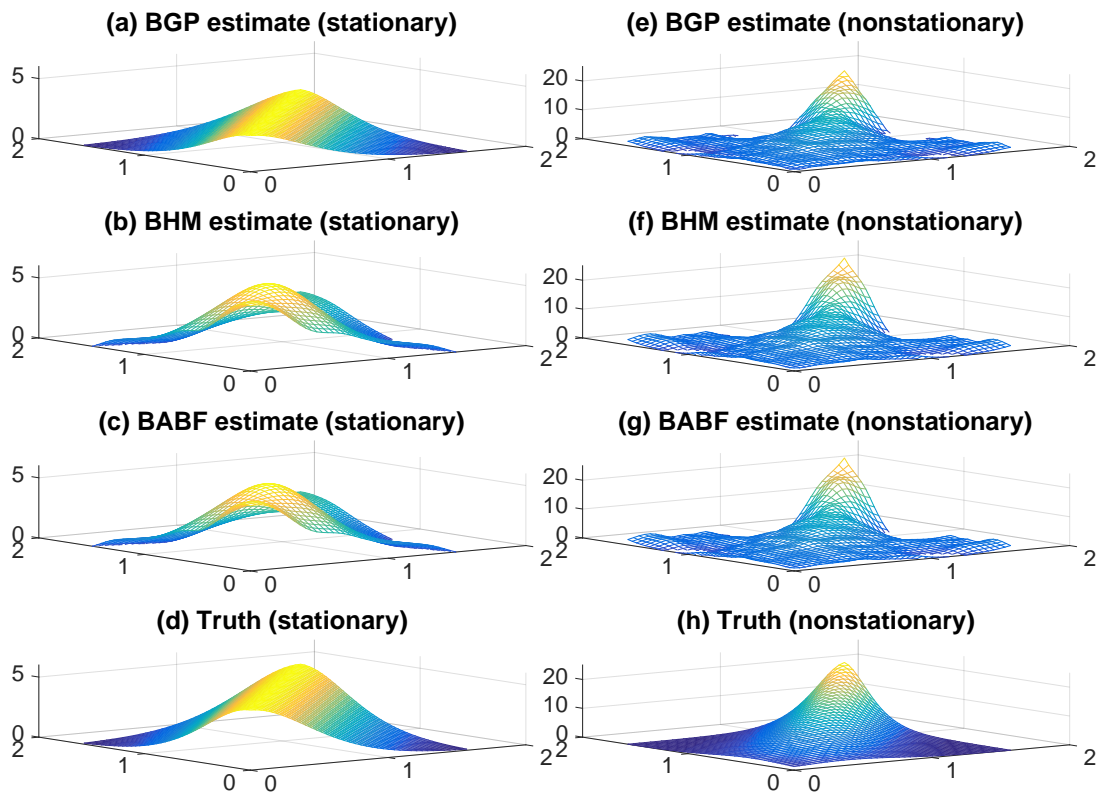

Web Figure 1: Covariance estimates and the true covariances of common grids.

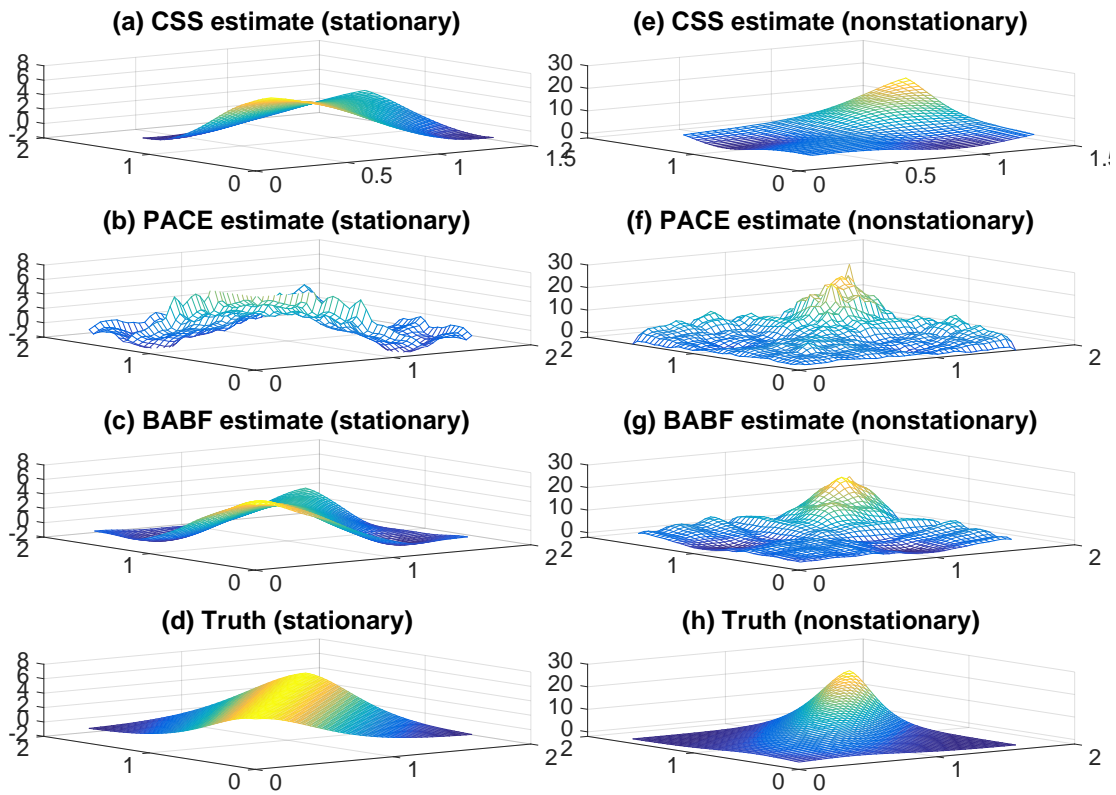

Web Figure 2: Covariance estimates and the true covariances of random grids.

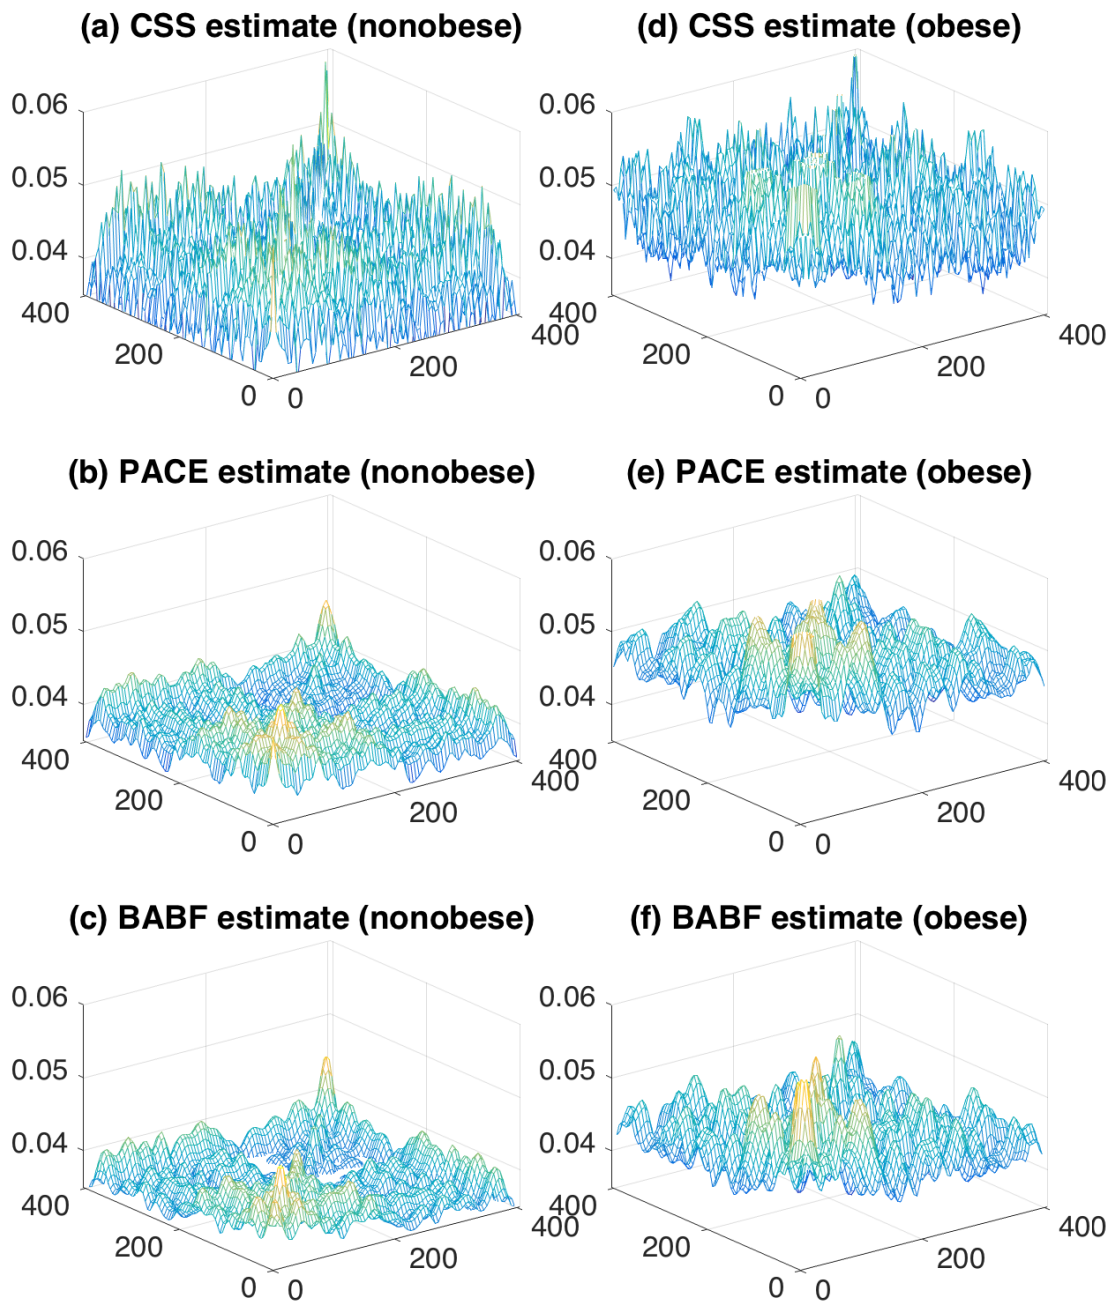

**Web Figure 3:** Covariance estimates by CSS, PACE, and BABF with the real SEE data.

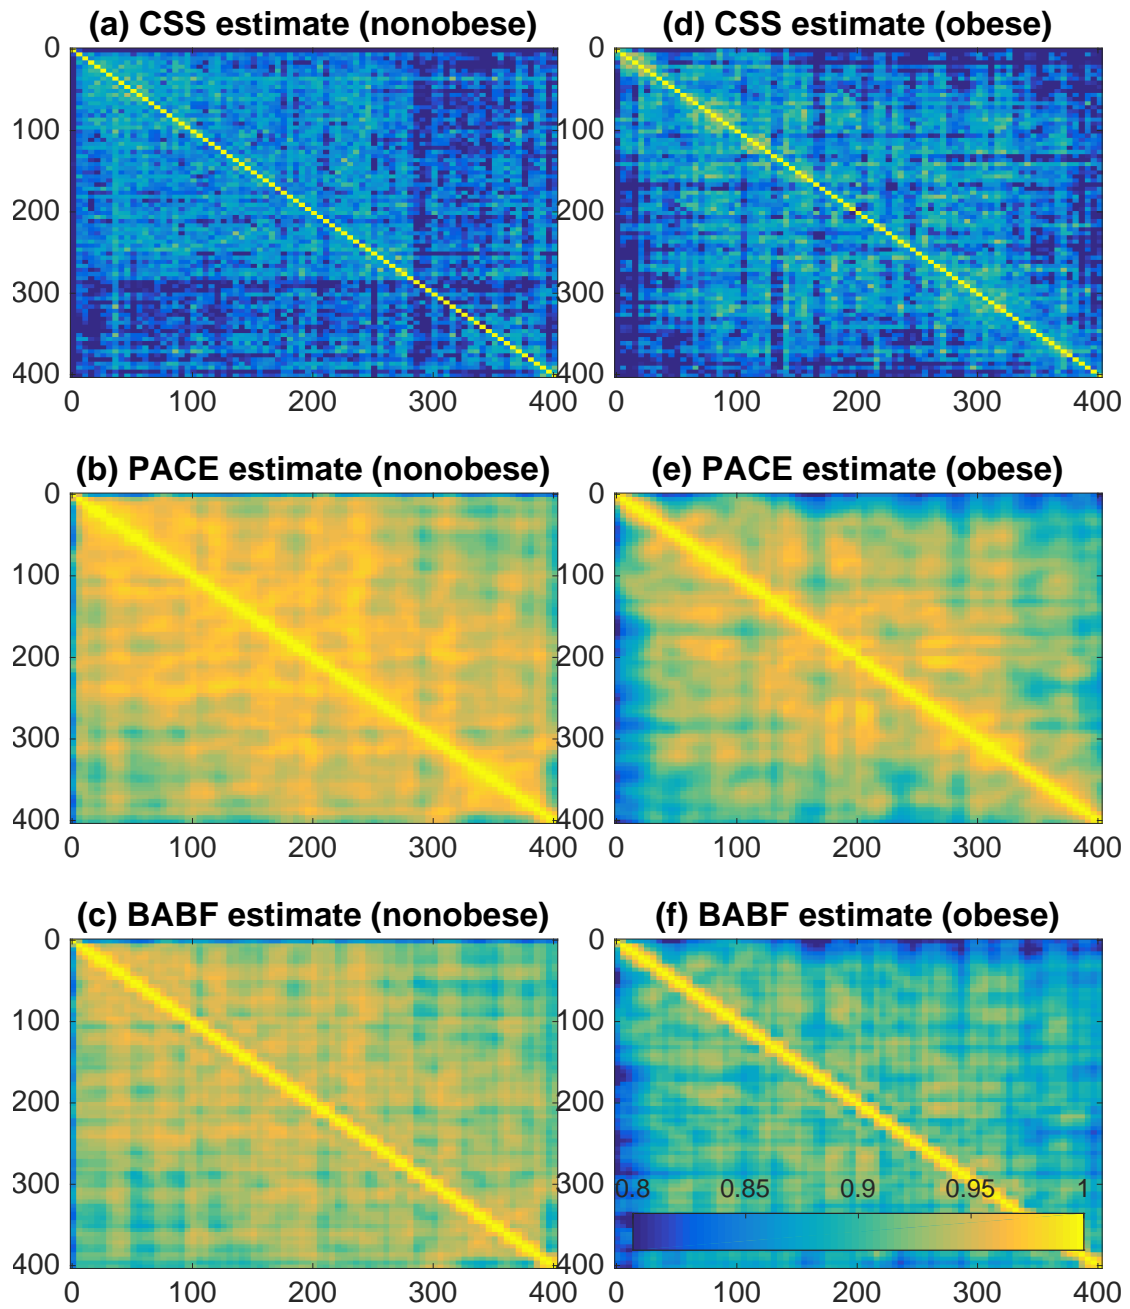

**Web Figure 4:** Heatmaps of the correlation estimates by CSS, PACE, and BABF with the real SEE data.

**Web Table 1:** Example coverage probabilities for the 95% pointwise credible intervals of  $\{Z_i(\mathbf{t})\}$ ,  $\mu(\mathbf{t})$ , and  $\Sigma(\mathbf{t}, \mathbf{t})$  by BGP, BHM and BABF with common observation grids. The highest probability is bold for each parameter.

|                                  |               | BGP           | BHM           | BABF          |
|----------------------------------|---------------|---------------|---------------|---------------|
| $\{Z_i(\mathbf{t})\}$            | Stationary    | <b>0.9483</b> | 0.9217        | 0.9208        |
|                                  | Nonstationary | 0.8350        | <b>0.9450</b> | 0.8742        |
| $\mu(\mathbf{t})$                | Stationary    | <b>0.7500</b> | 0.7250        | 0.7250        |
|                                  | Nonstationary | 0.6750        | 0.6750        | 0.6750        |
| $\Sigma(\mathbf{t}, \mathbf{t})$ | Stationary    | 0.0000        | <b>0.7869</b> | <b>0.7869</b> |
|                                  | Nonstationary | 0.3819        | 0.9913        | <b>0.9938</b> |

**Web Table 2:** Example coverage probabilities for the 95% pointwise credible intervals of  $\{Z_i(\mathbf{t})\}$ ,  $\mu(\mathbf{t})$ , and  $\Sigma(\mathbf{t}, \mathbf{t})$  by BABF with random observation grids. The relatively low coverage probabilities for nonstationary signals are due to narrow 95% confidence intervals.

|                                  |               | BABF   |
|----------------------------------|---------------|--------|
| $\{Z_i(\mathbf{t})\}$            | Stationary    | 0.8650 |
|                                  | Nonstationary | 0.5625 |
| $\mu(\mathbf{t})$                | Stationary    | 1.0000 |
|                                  | Nonstationary | 0.9000 |
| $\Sigma(\mathbf{t}, \mathbf{t})$ | Stationary    | 0.9506 |
|                                  | Nonstationary | 0.8550 |
